# Supplementary material
Source: Springer Nature journal article supplement (https://www.springermedizin.de/resource/supplementary/12913_2013_3139_MOESM2_ESM.pdf/9532396)

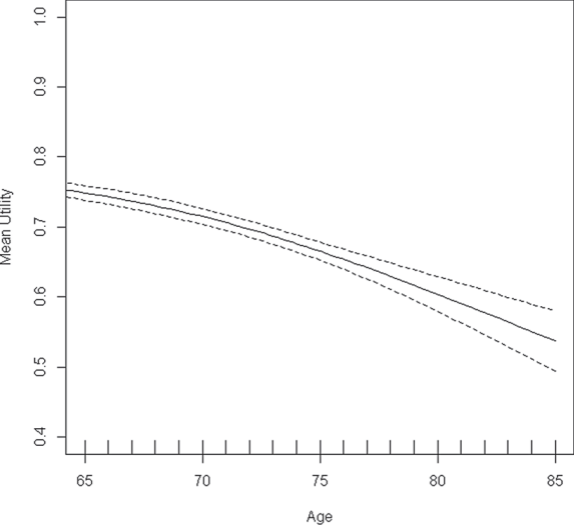

---- = upper and lower 95% confidence interval

— = mean

Supplement: MOESM2 [file 9532396]
